# Supplementary material for: A Practical Method to Implement Strain-Level Metagenomics-Based Foodborne Outbreak Investigation and Source Tracking in Routine
Source: MDPI journal article supplement (doi:10.3390/microorganisms8081191), 2020-08-05
Supplement: s1 [file sup_mat_1.pdf › sup_mat_1.pdf]

| Sample ID      | Description                                                                                                                                 | Matrix      | Biological replicate | Sequencing run * | CFU of STEC spiked in 25g food matrix | STEC spiked              | Workflow | qPCR of the DNA extract |            |             |             |
|----------------|---------------------------------------------------------------------------------------------------------------------------------------------|-------------|----------------------|------------------|---------------------------------------|--------------------------|----------|-------------------------|------------|-------------|-------------|
|                |                                                                                                                                             |             |                      |                  |                                       |                          |          | <i>uidA</i>             | <i>eae</i> | <i>stx1</i> | <i>stx2</i> |
| N BK 0 -1      | Blank beef not enriched, extracted with Nucleospin Food, biological replicate 1                                                             | Beef        | 1                    | 1                | 0                                     | -                        | -        | 33.27                   | ND         | ND          | ND          |
| N Bk 24-1      | Blank beef enriched 24h, extracted with Nucleospin Food, biological replicate 1                                                             | Beef        | 1                    | 1                | 0                                     | -                        | A        | 21.63                   | ND         | ND          | ND          |
| N Bk 24-2      | Blank beef enriched 24h, extracted with Nucleospin Food, biological replicate 2                                                             | Beef        | 2                    | 2                | 0                                     | -                        | A        | 18.33                   | ND         | ND          | ND          |
| N Bk 24-3      | Blank beef enriched 24h, extracted with Nucleospin Food, biological replicate 3                                                             | Beef        | 3                    | 2                | 0                                     | -                        | A        | 16.41                   | ND         | ND          | ND          |
| beef_A-1       | Beef spiked with 6 CFU of STEC enriched 24h, extracted with Nucleospin Food, biological replicate 1                                         | Beef        | 1                    | 1                | 6                                     | TIAC 1152                | A        | 20.46                   | 21.56      | 21.19       | 22.01       |
| beef_A-2       | Beef spiked with 6 CFU of STEC enriched 24h, extracted with Nucleospin Food, biological replicate 2                                         | Beef        | 2                    | 2                | 6                                     | TIAC 1152                | A        | 19.34                   | 19.27      | 19.3        | 20.51       |
| beef_A1-3      | Beef spiked with 6 CFU of STEC enriched 24h, extracted with Nucleospin Food, biological replicate 3, technical replicate 1                  | Beef        | 3                    | 2                | 6                                     | TIAC 1152                | A        | 19.38                   | 20.49      | 20.42       | 21.32       |
| beef_A2-3      | Beef spiked with 6 CFU of STEC enriched 24h, extracted with Nucleospin Food, biological replicate 3, technical replicate 2                  | Beef        | 3                    | 2                | 6                                     | TIAC 1152                | A        | 19.39                   | 20.14      | 20.08       | 21.23       |
| beef_A3-3      | Beef spiked with 6 CFU of STEC enriched 24h, extracted with Nucleospin Food, biological replicate 3, technical replicate 3                  | Beef        | 3                    | 2                | 6                                     | TIAC 1152                | A        | 19.35                   | 20.63      | 20.38       | 21.35       |
| beef_B         | Beef spiked with 6 CFU of STEC enriched 24h, extracted with Dneasy Blood&Tissue, biological replicate 1                                     | Beef        | 1                    | 1                | 6                                     | TIAC 1152                | B        | 18.67                   | 19.82      | 19.42       | 20.69       |
| beef_C         | Beef spiked with 6 CFU of STEC enriched 24h, extracted with Zymo Research HostZero, biological replicate 1                                  | Beef        | 1                    | 1                | 6                                     | TIAC 1152                | C        | 17.78                   | 18.72      | 18.64       | 20.06       |
| beef_D         | Beef spiked with 6 CFU of STEC enriched 16h, extracted with Nucleospin Food, biological replicate 3                                         | Beef        | 3                    | 2                | 6                                     | TIAC 1152                | D        | 19.53                   | 20.38      | 20.20       | 21.5        |
| beef_E         | Beef spiked with 6 CFU of STEC enriched 16h, extracted with Nucleospin Food and amplified with phi29 DNA polymerase, biological replicate 3 | Beef        | 3                    | 2                | 6                                     | TIAC 1152                | E        | 22.8                    | 23.97      | 24.76       | 25.33       |
| goat_Bk_24     | Blank goat cheese enriched 24h extracted with Nucleospin Food                                                                               | Goat cheese | 1                    | 3                | 0                                     | -                        | A        | ND                      | ND         | ND          | ND          |
| goat_O103      | Goat cheese spiked with 7CFU STEC O103, enriched 24h and extracted with Nucleospin Food                                                     | Goat cheese | 1                    | 3                | 7                                     | TIAC 1220                | A        | 16.3                    | 15.96      | 16.24       | ND          |
| goat_O145      | Goat cheese spiked with 5CFU STEC O145, enriched 24h and extracted with Nucleospin Food                                                     | Goat cheese | 1                    | 3                | 5                                     | TIAC 1878                | A        | 22.25                   | 15.9       | 15.94       | ND          |
| goat_O103+O145 | Goat cheese spiked with 7CFU STEC O103 and 5 CFU STEC O145, enriched 24h and extracted with Nucleospin Food                                 | Goat cheese | 1                    | 3                | 7-5                                   | TIAC 1220 -<br>TIAC 1878 | A        | 16.74                   | 15.46      | 15.7        | ND          |

Table S1: Description of the samples and qPCR result on the DNA extract

ND: not detected after 40 qPCR cycles

\*: Runs of 12 libraries, including other samples that are not presented in this study
