# Supplementary material for: A Practical Method to Implement Strain-Level Metagenomics-Based Foodborne Outbreak Investigation and Source Tracking in Routine
Source: MDPI journal article supplement (doi:10.3390/microorganisms8081191), 2020-08-05
Supplement: s1 [file sup_mat_2.pdf › sup_mat_2.pdf]

| Sample         | Sequenced reads | Surviving reads after trimming | wzx   |           |            |       | flc   |           |            |       | stx1   |           |            |       | stx2   |           |            |       | ese       |            |       | ehxA      |            |       |
|----------------|-----------------|--------------------------------|-------|-----------|------------|-------|-------|-----------|------------|-------|--------|-----------|------------|-------|--------|-----------|------------|-------|-----------|------------|-------|-----------|------------|-------|
|                |                 |                                | Locus | % covered | % Identity | depth | Locus | % covered | % Identity | depth | Locus  | % covered | % Identity | depth | Locus  | % covered | % Identity | depth | % covered | % Identity | depth | % covered | % Identity | depth |
| beef_Bk-0-1    | 2475845         | 2695013                        | ND    | ND        | ND         | ND    | ND    | ND        | ND         | ND    | ND     | ND        | ND         | ND    | ND     | ND        | ND         | ND    | ND        | ND         | ND    | ND        | ND         | ND    |
| beef_Bk-24-1   | 1637549         | 1637437                        | ND    | ND        | ND         | ND    | ND    | ND        | ND         | ND    | ND     | ND        | ND         | ND    | ND     | ND        | ND         | ND    | ND        | ND         | ND    | ND        | ND         | ND    |
| beef_Bk-24-2   | 1139280         | 1139214                        | ND    | ND        | ND         | ND    | ND    | ND        | ND         | ND    | ND     | ND        | ND         | ND    | ND     | ND        | ND         | ND    | ND        | ND         | ND    | ND        | ND         | ND    |
| beef_Bk-24-3   | 2695362         | 2695013                        | ND    | ND        | ND         | ND    | ND    | ND        | ND         | ND    | ND     | ND        | ND         | ND    | ND     | ND        | ND         | ND    | ND        | ND         | ND    | ND        | ND         | ND    |
| beef_A-1       | 1735479         | 1735304                        | O157  | 88,11     | 100        | 5,1   | H7    | 91,35     | 100        | 4,23  | stx1 a | 76,85     | 100        | 4,11  | stx2 a | 92,83     | 100        | 7,89  | 100       | 100        | 5,47  | 95        | 100        | 3,09  |
| beef_A-2       | 1153272         | 1153119                        | O157  | 100       | 92         | 9,88  | H7    | 100       | 100        | 8,24  | stx1 a | 100       | 100        | 9,52  | stx2 a | 100       | 100        | 15,86 | 100       | 100        | 13,51 | 100       | 100        | 9,18  |
| beef_A1-3      | 2317908         | 2317508                        | O157  | 92,77     | 100        | 10,5  | H7    | 97,78     | 99,77      | 7,57  | stx1 a | 100       | 100        | 12,11 | stx2 a | 100       | 100        | 13,24 | 100       | 100        | 12,79 | 96,9      | 100        | 6,3   |
| beef_A2-3      | 2937756         | 2937309                        | O157  | 100       | 100        | 10,91 | H7    | 100       | 100        | 11,24 | stx1 a | 100       | 100        | 15,2  | stx2 a | 100       | 100        | 16,81 | 100       | 100        | 21,1  | 99        | 100        | 10,03 |
| beef_A3-3      | 2204578         | 2204197                        | O157  | 100       | 100        | 5,89  | H7    | 98,46     | 99,48      | 9     | stx1 a | 100       | 100        | 7,67  | stx2 a | 100       | 100        | 10,24 | 100       | 100        | 11,85 | 98,06     | 100        | 4,99  |
| beef_B         | 1006641         | 1006503                        | O157  | 89,8      | 100        | 1,96  | H7    | 93        | 100        | 3,96  | stx1 a | 97,31     | 100        | 2,31  | stx2 a | 100       | 100        | 4,07  | 91,41     | 100        | 3,8   | 89,36     | 100        | 2,46  |
| beef_C         | 2269583         | 2269391                        | O157  | 100       | 100        | 6,29  | H7    | 100       | 100        | 13,26 | stx1 a | 100       | 100        | 13,24 | stx2 a | 100       | 100        | 11,37 | 100       | 100        | 15,57 | 100       | 100        | 29,67 |
| beef_D         | 2224794         | 2224472                        | O157  | 100       | 100        | 5,44  | H7    | 100       | 89         | 12,85 | stx1 a | 100       | 100        | 9,45  | stx2 a | 100       | 100        | 8,03  | 100       | 100        | 11,37 | 100       | 100        | 8,85  |
| beef_E         | 3307077         | 3306665                        | O157  | 100       | 100        | 10,93 | H7    | 100       | 89         | 15,52 | stx1 a | 100       | 100        | 10    | stx2 a | 100       | 100        | 11,84 | 100       | 100        | 14,39 | 100       | 100        | 8,37  |
| goat_Bk_24     | 2630580         | 2630000                        | ND    | ND        | ND         | ND    | ND    | ND        | ND         | ND    | ND     | ND        | ND         | ND    | ND     | ND        | ND         | ND    | ND        | ND         | ND    | ND        | ND         | ND    |
| goat_O103      | 2041482         | 2041209                        | O103  | 100       | 100        | 72,39 | H2    | 100       | 100        | 81,31 | stx1 a | 100       | 100        | 87,98 | ND     | ND        | ND         | ND    | 100       | 100        | 102,1 | 100       | 100        | 78,52 |
| goat_O145      | 2715903         | 2715593                        | O145  | 100       | 100        | 66,02 | H28   | 83,97     | 98,15      | 106,6 | stx1 a | 100       | 100        | 149,8 | ND     | ND        | ND         | ND    | 63        | 93,48      | 13,83 | 100       | 100        | 117,9 |
| goat_O103+O145 | 2919551         | 2919286                        | O103  | 100       | 100        | 47,05 | H2    | 100       | 100        | 61,64 | stx1 a | 100       | 100        | 167,9 | ND     | ND        | ND         | ND    | 100       | 99,86      | 159,2 | 100       | 99,97      | 177,8 |
|                |                 |                                | O145  | 100       | 100        | 39,85 | H28   | 83,97     | 98,15      | 80,18 |        |           |            |       | ND     | ND        | ND         | ND    |           |            |       |           |            |       |

Table S2: Gene detection in all metagenomics samples using SRST2  
ND: not detected
