# Supplementary material for: A Practical Method to Implement Strain-Level Metagenomics-Based Foodborne Outbreak Investigation and Source Tracking in Routine
Source: MDPI journal article supplement (doi:10.3390/microorganisms8081191), 2020-08-05
Supplement: s1 [file sup_mat_3.pdf › sup_mat_3.pdf]

|                         | O103-EH1717 | O103-EH1782 | O103-EH1831 | O103-TIAC1878 | O103-TIAC1884 | O103-TIAC1885 | O113-TIAC1660 | O145-EH1533 | O145-EH1846 | O145-TIAC1200 | O145-TIAC1596 | O157-TIAC1151 | O157-TIAC1152 | O157-TIAC1153 | O157-TIAC1165 | O157-TIAC1169 | O157-TIAC1638 | beef_B_STEC_O157 | beef_C_STEC_O157 | beef_D_5_TECO157 | beef_E_STEC_O157 | beef_A_2_STECO157 | beef_A_1_STECO157 | beef_A1_3_STECO157 | beef_A2_3_STECO157 | beef_A3_3_STECO157 | beef_isolate_O157-1 | beef_isolate_O157-2 | beef_isolate_O157-3 | goat_O10_3+O145_5_TECO203 | goat_O103+O145_STECO145 | goat_O10_3_STECO145 | goat_O145_STECO145 | goat_isolate_O103 | goat_isolate_O145 | reference |    |
|-------------------------|-------------|-------------|-------------|---------------|---------------|---------------|---------------|-------------|-------------|---------------|---------------|---------------|---------------|---------------|---------------|---------------|---------------|------------------|------------------|------------------|------------------|-------------------|-------------------|--------------------|--------------------|--------------------|---------------------|---------------------|---------------------|---------------------------|-------------------------|---------------------|--------------------|-------------------|-------------------|-----------|----|
| O103-EH1717             | 0           | 28          | 128         | 97            | 85            | 111           | 2327          | 9443        | 9586        | 9634          | 9431          | 9522          | 8267          | 9625          | 6265          | 9387          | 7532          | 4951             | 9303             | 8115             | 8675             | 8487              | 5299              | 8240               | 9431               | 8584               | 9214                | 8852                | 9642                | 304                       | 10320                   | 70                  | 10242              | 97                | 9634              | 11099     |    |
| O103-EH1782             | 27          | 0           | 129         | 71            | 61            | 90            | 2353          | 9721        | 9862        | 9924          | 9692          | 9760          | 8456          | 9853          | 6380          | 9620          | 7729          | 5055             | 9542             | 8306             | 8946             | 8672              | 5424              | 8451               | 9655               | 8777               | 9469                | 9059                | 9857                | 73                        | 10632                   | 46                  | 10561              | 71                | 9923              | 11383     |    |
| O103-EH1831             | 129         | 133         | 0           | 120           | 104           | 105           | 2368          | 9716        | 9834        | 9877          | 9656          | 9797          | 8490          | 9888          | 6437          | 9632          | 7758          | 5061             | 9558             | 8346             | 8916             | 8713              | 5421              | 8462               | 9663               | 8776               | 9507                | 9088                | 9904                | 125                       | 10584                   | 84                  | 10499              | 120               | 9877              | 11401     |    |
| O103-TIAC1878           | 99          | 75          | 122         | 0             | 1             | 91            | 2383          | 9796        | 9881        | 9966          | 9727          | 9887          | 8589          | 9999          | 6470          | 9735          | 7832          | 5113             | 9650             | 8430             | 8996             | 8810              | 5496              | 8566               | 9778               | 8880               | 9616                | 9176                | 10003               | 2                         | 10697                   | 1                   | 10617              | 0                 | 9966              | 11525     |    |
| O103-TIAC1884           | 83          | 69          | 113         | 1             | 0             | 85            | 2340          | 9501        | 9608        | 9669          | 9450          | 9324          | 8100          | 9407          | 6190          | 9179          | 7412          | 4822             | 9082             | 7916             | 8478             | 8261              | 5171              | 8063               | 9204               | 8351               | 9047                | 8689                | 9412                | 2                         | 10343                   | 1                   | 10285              | 1                 | 9669              | 10826     |    |
| O103-TIAC1885           | 120         | 100         | 112         | 95            | 83            | 0             | 2333          | 9513        | 9612        | 9672          | 9451          | 9404          | 8178          | 9436          | 6198          | 9332          | 7501          | 4888             | 9156             | 8007             | 8559             | 8357              | 5327              | 8128               | 9267               | 8444               | 9117                | 8714                | 9487                | 91                        | 10360                   | 66                  | 10289              | 85                | 9671              | 10976     |    |
| O113-TIAC1660           | 4203        | 4372        | 4245        | 4195          | 3850          | 3922          | 0             | 10474       | 10565       | 10589         | 10399         | 10809         | 9521          | 10897         | 7322          | 10654         | 8825          | 5663             | 10448            | 9164             | 9798             | 9527              | 6092              | 9254               | 10638              | 9633               | 10525               | 10098               | 10833               | 4420                      | 11309                   | 3050                | 11271              | 4195              | 10589             | 12343     |    |
| O145-EH1533             | 8824        | 9343        | 9011        | 8921          | 8087          | 8275          | 5418          | 0           | 498         | 489           | 491           | 7759          | 6760          | 7844          | 5097          | 7622          | 6177          | 4020             | 7574             | 6513             | 7005             | 6950              | 4364              | 6696               | 7727               | 6975               | 7544                | 7254                | 7849                | 9536                      | 508                     | 6204                | 508                | 8921              | 488               | 9047      |    |
| O145-EH1846             | 8874        | 9389        | 9035        | 8914          | 8101          | 8282          | 5414          | 493         | 0           | 60            | 17            | 7693          | 6682          | 7726          | 5033          | 7535          | 6089          | 3963             | 7487             | 6433             | 6905             | 6858              | 4310              | 6647               | 7650               | 6913               | 7458                | 7156                | 7759                | 9553                      | 57                      | 6210                | 63                 | 8914              | 60                | 8939      |    |
| O145-TIAC1200           | 8902        | 9420        | 9047        | 8964          | 8138          | 8309          | 5410          | 483         | 60          | 0             | 56            | 7671          | 6678          | 7741          | 4999          | 7507          | 6058          | 3976             | 7503             | 6434             | 6892             | 6846              | 4300              | 6654               | 7661               | 6892               | 7461                | 7138                | 7769                | 9583                      | 3                       | 6217                | 1                  | 8963              | 0                 | 8937      |    |
| O145-TIAC1596           | 8824        | 9327        | 8966        | 8870          | 8054          | 8231          | 5386          | 491         | 17          | 56            | 0             | 7581          | 6610          | 7635          | 4970          | 7434          | 6011          | 3908             | 7406             | 6366             | 6802             | 6782              | 4245              | 6559               | 7551               | 6795               | 7369                | 7054                | 7677                | 9491                      | 54                      | 6174                | 56                 | 8870              | 56                | 8825      |    |
| O157-TIAC1151           | 7910        | 8339        | 8076        | 8004          | 7055          | 7272          | 4970          | 6897        | 6903        | 6904          | 6730          | 0             | 0             | 131           | 0             | 0             | 33            | 0                | 0                | 0                | 0                | 0                 | 0                 | 0                  | 0                  | 0                  | 0                   | 0                   | 0                   | 0                         | 8613                    | 7712                | 5924               | 7707              | 8004              | 6904      | 38 |
| O157-TIAC1152           | 7890        | 8300        | 8041        | 7988          | 7041          | 7265          | 5036          | 6903        | 6889        | 6906          | 6742          | 0             | 0             | 131           | 0             | 0             | 33            | 0                | 0                | 0                | 0                | 0                 | 0                 | 0                  | 0                  | 0                  | 0                   | 0                   | 0                   | 0                         | 8578                    | 7704                | 5975               | 7708              | 7988              | 6907      | 37 |
| O157-TIAC1153           | 8064        | 8490        | 8271        | 8164          | 7179          | 7361          | 5054          | 7032        | 6993        | 7029          | 6836          | 132           | 115           | 0             | 95            | 132           | 301           | 68               | 128              | 109              | 126              | 116               | 80                | 130                | 128                | 116                | 130                 | 127                 | 136                 | 8745                      | 7843                    | 6009                | 7836               | 8163              | 7029              | 144       |    |
| O157-TIAC1165           | 7727        | 8094        | 7879        | 7777          | 6954          | 7115          | 4999          | 6727        | 6706        | 6680          | 6552          | 0             | 0             | 140           | 0             | 0             | 34            | 0                | 0                | 0                | 0                | 0                 | 0                 | 0                  | 0                  | 0                  | 0                   | 0                   | 0                   | 0                         | 8359                    | 7472                | 6039               | 7487              | 7776              | 6681      | 37 |
| O157-TIAC1169           | 7915        | 8333        | 8060        | 7999          | 7049          | 7245          | 4973          | 6877        | 6863        | 6858          | 6699          | 0             | 0             | 133           | 0             | 0             | 32            | 0                | 0                | 0                | 0                | 0                 | 0                 | 0                  | 0                  | 0                  | 0                   | 0                   | 0                   | 0                         | 8591                    | 7669                | 5931               | 7681              | 7998              | 6858      | 40 |
| O157-TIAC1638           | 7745        | 8174        | 7917        | 7849          | 6942          | 7180          | 5023          | 6796        | 6764        | 6750          | 6605          | 41            | 35            | 127           | 28            | 99            | 0             | 21               | 38               | 33               | 35               | 35                | 34                | 33                 | 38                 | 30                 | 39                  | 36                  | 43                  | 8412                      | 7523                    | 5978                | 7556               | 7849              | 6750              | 69        |    |
| beef_B_STECO157         | 7605        | 7985        | 7724        | 7656          | 6745          | 6988          | 4817          | 6607        | 6575        | 6617          | 6412          | 0             | 0             | 125           | 0             | 0             | 31            | 0                | 0                | 0                | 0                | 0                 | 0                 | 0                  | 0                  | 0                  | 0                   | 0                   | 0                   | 0                         | 8551                    | 7371                | 5701               | 7387              | 7655              | 6646      | 37 |
| beef_C_STECO157         | 8042        | 8484        | 8200        | 8129          | 7150          | 7367          | 4999          | 7007        | 6991        | 7027          | 6843          | 0             | 0             | 132           | 0             | 0             | 32            | 0                | 0                | 0                | 0                | 0                 | 0                 | 0                  | 0                  | 0                  | 0                   | 0                   | 0                   | 0                         | 8763                    | 7839                | 5863               | 7832              | 8129              | 7028      | 37 |
| beef_D_5_TECO157        | 8103        | 8530        | 8271        | 8203          | 7199          | 7442          | 5065          | 6959        | 6939        | 6961          | 6794          | 0             | 0             | 130           | 0             | 0             | 32            | 0                | 0                | 0                | 0                | 0                 | 0                 | 0                  | 0                  | 0                  | 0                   | 0                   | 0                   | 0                         | 8815                    | 7800                | 6004               | 7799              | 8202              | 6961      | 35 |
| beef_E_STECO157         | 8065        | 8458        | 8226        | 8150          | 7179          | 7407          | 5043          | 6970        | 6935        | 6942          | 6759          | 0             | 0             | 140           | 0             | 0             | 32            | 0                | 0                | 0                | 0                | 0                 | 0                 | 0                  | 0                  | 0                  | 0                   | 0                   | 0                   | 0                         | 8750                    | 7775                | 5995               | 7754              | 8156              | 6942      | 37 |
| beef_A_2_STECO157       | 7894        | 8296        | 8042        | 7988          | 7236          | 7495          | 4905          | 6917        | 6891        | 6999          | 6742          | 0             | 0             | 129           | 0             | 0             | 31            | 0                | 0                | 0                | 0                | 0                 | 0                 | 0                  | 0                  | 0                  | 0                   | 0                   | 0                   | 0                         | 8579                    | 7722                | 5818               | 7730              | 7985              | 6899      | 36 |
| beef_A_1_STECO157       | 7658        | 8062        | 7775        | 7740          | 6806          | 7031          | 4873          | 6748        | 6729        | 6732          | 6556          | 1             | 0             | 137           | 0             | 1             | 34            | 0                | 1                | 0                | 0                | 0                 | 0                 | 0                  | 0                  | 0                  | 0                   | 0                   | 0                   | 0                         | 8318                    | 7454                | 5797               | 7459              | 7740              | 6732      | 43 |
| beef_A1-3_STECO157      | 7853        | 8283        | 8003        | 7956          | 7000          | 7210          | 4882          | 6829        | 6843        | 6871          | 6680          | 0             | 0             | 125           | 0             | 0             | 31            | 0                | 0                | 0                | 0                | 0                 | 0                 | 0                  | 0                  | 0                  | 0                   | 0                   | 0                   | 0                         | 8555                    | 7655                | 5833               | 7657              | 7955              | 6870      | 37 |
| beef_A2-3_STECO157      | 7864        | 8180        | 7996        | 7943          | 6986          | 7192          | 4910          | 6894        | 6900        | 6921          | 6728          | 0             | 0             | 128           | 0             | 0             | 31            | 0                | 0                | 0                | 0                | 0                 | 0                 | 0                  | 0                  | 0                  | 0                   | 0                   | 0                   | 0                         | 8336                    | 7733                | 5801               | 7727              | 7945              | 6930      | 37 |
| beef_A3-3_STECO157      | 7880        | 8287        | 7996        | 7943          | 6983          | 7216          | 4895          | 6852        | 6856        | 6855          | 6666          | 0             | 0             | 127           | 0             | 0             | 27            | 0                | 0                | 0                | 0                | 0                 | 1                 | 0                  | 0                  | 0                  | 0                   | 0                   | 0                   | 0                         | 8527                    | 7648                | 5788               | 7648              | 7944              | 6855      | 34 |
| beef_isolate_O157-1     | 7890        | 8340        | 8080        | 8025          | 7057          | 7267          | 4989          | 6913        | 6899        | 6923          | 6744          | 0             | 0             | 133           | 0             | 0             | 33            | 0                | 0                | 0                | 0                | 0                 | 0                 | 0                  | 0                  | 0                  | 0                   | 0                   | 0                   | 0                         | 8620                    | 7722                | 5822               | 7733              | 8024              | 6923      | 40 |
| beef_isolate_O157-2     | 7911        | 8327        | 8063        | 7992          | 7074          | 7249          | 4996          | 6938        | 6909        | 6912          | 6738          | 0             | 0             | 136           | 0             | 0             | 31            | 0                | 0                | 0                | 0                | 0                 | 0                 | 0                  | 0                  | 0                  | 0                   | 0                   | 0                   | 0                         | 8607                    | 7729                | 5953               | 7729              | 7992              | 6912      | 39 |
| beef_isolate_O157-3     | 7914        | 8320        | 8067        | 8001          | 7036          | 7255          | 4922          | 6894        | 6879        | 6909          | 6734          | 0             | 0             | 133           | 0             | 0             | 34            | 0                | 0                | 0                | 0                | 0                 | 0                 | 0                  | 0                  | 0                  | 0                   | 0                   | 0                   | 0                         | 8599                    | 7704                | 5911               | 7703              | 8001              | 6910      | 42 |
| goat_O103+O145_STECO103 | 105         | 76          | 125         | -2            | -2            | 86            | 2466          | 10286       | 10402       | 10407         | 10224         | 10451         | 9062          | 10521         | 6831          | 10271         | 8246          | 5415             | 10207            | 8899             | 9486             | 9298              | 5802              | 9049               | 10320              | 9363               | 10146               | 9707                | 10561               | 0                         | 11238                   | 1                   | 11177              | 2                 | 10467             | 12169     |    |
| goat_O103+O145_STECO145 | 8976        | 9511        | 9136        | 9067          | 8194          | 8387          | 5445          | 473         | 54          | 2             | 50            | 8075          | 7020          | 8142          | 5269          | 7911          | 6364          | 4174             | 7887             | 6794             | 7273             | 7220              | 4486              | 6986               | 8066               | 7246               | 7843                | 7522                | 8164                | 9696                      | 0                       | 6263                | 0                  | 9067              | 2                 | 9425      |    |
| goat_O103_STECO103      | 108         | 73          | 130         | 1             | 1             | 96            | 2628          | 10333       | 10442       | 10484         | 10270         | 11099         | 9744          | 11162         | 7621          | 10949         | 9048          | 5777             | 10736            | 9358             | 10036            | 9738              | 6243              | 9526               | 10829              | 9813               | 10764               | 10367               | 11210               | -2                        | 11208                   | 0                   | 11176              | 1                 | 10484             | 12643     |    |
| goat_O145_STECO145      | 8985        | 9533        | 9146        | 9082          | 8322          | 8406          | 5476          | 477         | 60          | 0             | 53            | 8144          | 7089          | 8209          | 5338          | 7996          | 6449          | 4221             | 7952             | 6856             | 7320             | 7295              | 4530              | 7052               | 8134               | 7312               | 7826                | 7590                | 8238                | 9732                      | 0                       | 6303                | 0                  | 9067              | 0                 | 9486      |    |
| goat_isolate_O103       | 100         | 75          | 123         | 0             | 1             | 91            | 2383          | 9797        | 9882        | 9966          | 9728          | 9887          | 8588          | 9999          | 6470          | 9735          | 7833          | 5113             | 9650             | 8429             | 8996             | 8810              | 5496              | 8566               | 9778               | 8880               | 9615                | 9176                | 10003               | 2                         | 10697                   | 1                   | 10618              | 0                 | 9966              | 11524     |    |
| goat_isolate_O145       | 8891        | 9419        | 9047        | 8964          | 8128          | 8309          | 5410          | 482         | 60          | 0             | 55            | 7671          | 6679          | 7743          | 5000          | 7507          | 6059          | 3976             | 7503             | 6434             | 6892             | 6846              | 4299              | 6654               | 7660               | 6891               | 7461                | 7137                | 7770                | 9583                      | 3                       | 6217                | 1                  | 8963              | 0                 | 8937      |    |
| reference               | 7328        | 7730        | 7471        | 7416          | 6511          | 6747          | 4512          | 6392        | 6375        | 6393          | 6227          | 30            | 25            | 114           | 20            | 31            | 44            | 16               | 28               | 23               | 27               | 25                | 19                | 25                 |                    |                    |                     |                     |                     |                           |                         |                     |                    |                   |                   |           |    |

Table S3: SNP distances matrix (per million genomic position) for STEC phylogenetic tree
