# Supplementary material for: A Practical Method to Implement Strain-Level Metagenomics-Based Foodborne Outbreak Investigation and Source Tracking in Routine
Source: MDPI journal article supplement (doi:10.3390/microorganisms8081191), 2020-08-05
Supplement: s1 [file sup_mat_4.pdf › sup_mat_4.pdf]

| Tree                              | Model | #Param | BIC       | AICc      | lnL        | Invariant | Gamma | R    | Freq A | Freq T | Freq C | Freq G | A=>T | A=>C | A=>G | T=>A | T=>C | T=>G | C=>A | C=>T | C=>G | G=>A | G=>T | G=>C |
|-----------------------------------|-------|--------|-----------|-----------|------------|-----------|-------|------|--------|--------|--------|--------|------|------|------|------|------|------|------|------|------|------|------|------|
| SNP tree of all STEC strains      | GTR   | 77,00  | 691312,49 | 690341,04 | -345093,52 | n/a       | n/a   | 6,94 | 0,24   | 0,24   | 0,26   | 0,26   | 0,02 | 0,02 | 0,23 | 0,02 | 0,23 | 0,02 | 0,02 | 0,21 | 0,00 | 0,21 | 0,02 | 0,00 |
| SNP tree of all STEC O157 strains | K2    | 34,00  | 5476,13   | 5229,85   | -2580,81   | n/a       | n/a   | 4,24 | 0,25   | 0,25   | 0,25   | 0,25   | 0,02 | 0,02 | 0,20 | 0,02 | 0,20 | 0,02 | 0,02 | 0,20 | 0,02 | 0,20 | 0,02 | 0,02 |
| SNP tree of all STEC O145 strains | K2    | 12,00  | 15956,54  | 15865,12  | -7920,55   | n/a       | n/a   | 5,15 | 0,25   | 0,25   | 0,25   | 0,25   | 0,02 | 0,02 | 0,21 | 0,02 | 0,21 | 0,02 | 0,02 | 0,21 | 0,02 | 0,21 | 0,02 | 0,02 |
| SNP tree of all STEC O103 strains | GTR   | 23,00  | 9966,48   | 9806,79   | -4880,32   | n/a       | n/a   | 2,34 | 0,21   | 0,21   | 0,28   | 0,30   | 0,03 | 0,07 | 0,21 | 0,03 | 0,19 | 0,06 | 0,05 | 0,15 | 0,00 | 0,15 | 0,05 | 0,00 |

Table S4: Model selection and parameters for all trees (Figure 5)

GTR: General Time Reversible Model (with uniform rates)

K2: Kimura 2-parameters model (with uniform rates)
