# Supplementary material for: A Practical Method to Implement Strain-Level Metagenomics-Based Foodborne Outbreak Investigation and Source Tracking in Routine
Source: MDPI journal article supplement (doi:10.3390/microorganisms8081191), 2020-08-05
Supplement: s1 [file sup_mat_5.pdf › sup_mat_5.pdf]

| Sample         | qPCR result crude extract from enriched food sample |            |             |             | gene detection isolate on WGS data |             |             |        |        |
|----------------|-----------------------------------------------------|------------|-------------|-------------|------------------------------------|-------------|-------------|--------|--------|
|                | <i>uidA</i>                                         | <i>eae</i> | <i>stx1</i> | <i>stx2</i> | <i>eae</i>                         | <i>stx1</i> | <i>stx2</i> | O-type | H-type |
| Beef_Bk-0h     | ND                                                  | ND         | ND          | ND          | N/A                                | N/A         | N/A         | N/A    | N/A    |
| Beef_Bk-24h-1  | 25,33                                               | ND         | ND          | ND          | N/A                                | N/A         | N/A         | N/A    | N/A    |
| Beef_Bk-24h-2  | 22,39                                               | ND         | ND          | ND          | N/A                                | N/A         | N/A         | N/A    | N/A    |
| Beef_Bk-24h-3  | 24,67                                               | ND         | ND          | ND          | N/A                                | N/A         | N/A         | N/A    | N/A    |
| Beef_24h -1    | 24,17                                               | 25,62      | 27,8        | 27,8        | +                                  | +           | +           | 157    | 7      |
| Beef_24h -2    | 22,42                                               | 22,07      | 23,95       | 23,64       | +                                  | +           | +           | 157    | 7      |
| Beef_24h -3    | 29,28                                               | 32,25      | 36,24       | 35,09       | +                                  | +           | +           | 157    | 7      |
| Beef_16h - 3   | 24,62                                               | 25,16      | 28,13       | 27,2        | +                                  | +           | +           | 157    | 7      |
| Goat_bk        | ND                                                  | ND         | ND          | ND          | N/A                                | N/A         | N/A         | N/A    | N/A    |
| Goat_O103      | 16,3                                                | 15,96      | 16,24       | 0           | +                                  | +           | N/A         | 103    | 2      |
| Goat_O145      | 22,25                                               | 15,9       | 15,94       | 0           | +                                  | +           | N/A         | 145    | 28     |
| Goat_O103+O145 | 16,74                                               | 15,46      | 15,7        | 0           | +                                  | +           | N/A         | 103    | 2      |
|                |                                                     |            |             |             | +                                  | +           | N/A         | 145    | 28     |

Table S5: qPCR results on the enriched food samples and gene detection (SRST2) performed on the isolates obtained from the samples.

N/A: not applicable (no isolate obtained or gene not present in the strain). +: detection of the gene with a minimum of 80% of coverage and depth of 5

ND: not detected after 40 qPCR cycles
